# Supplementary material for: Distinct macronutrient ratios optimize offspring survival, growth and maternal glucose tolerance across mouse reproduction
Source: Research Square preprint supplement (doi:10.21203/rs.3.rs-6517149/v1), 2025-04-25
Supplement: Supplementary file 1 [file 1e2ff510ef3e7acc0dd31ad0.docx]

Table S1. The results of models on pregnancy traits selected by AIC values as being the best fit for the data. Models are mixture models built in glmmTMB, and those tested included linear, quadratic and cubic relationships between diet components and interactions between diet components. Statistics reported are Coefficient estimates and 95% Confidence Intervals for each variable included in the best fitting model and the deviance, residual degrees of freedom and p value of Chisq Likelihood Ratio Test of the best model against null models for the effect of diet. Models tested the effect of diet: The rate of fetus viability (proportion of fetuses which were viable at gestation day 17.5), the combined weight of viable fetuses (g), the number of unsuccessful fetuses (either reabsorbed or deceased on gestation day 17.5), the weight of the placenta (g), the relative size of the junctional zone in the placenta, and the absolute size of the labyrinthine zone in the placenta. Significant results are highlighted in bold.

| Rate of Fetus Viability |  |  |  |
| --- | --- | --- | --- |
| Variable | estimate | 2.5% CI | 97.5% CI |
| Protein | 4.99 | 0.22 | 10.76 |
| **Carb** | **6.24** | **2.59** | **10.48** |
| **Fat** | **8.62** | **2.16** | **15.55** |
| **Carb*Fat** | **-35.11** | **-62.12** | **-9.09** |
| LRT to Null Model | Deviance | df | p |
| **Diet** | **147.38** | **4** | **<0.001** |
| Average Foetus Weight (g) |  |  |  |
| Variable | estimate | 2.5% CI | 97.5% CI |
| **Protein** | **-3.54** | **-5.51** | **-1.56** |
| **Fat** | **-1.65** | **-2.45** | **-0.85** |
| Carb | -0.25 | -0.70 | 0.20 |
| **Protein*Fat** | **8.62** | **1.85** | **15.40** |
| LRT to Null Model | Deviance | df | p |
| Diet | 27.93 | 4.00 | <0.001 |
| Number of Reabsorbed and Dead Embryos | |  |  |
| Variable | estimate | 2.5% CI | 97.5% CI |
| Protein | -2.79 | -8.38 | 1.85 |
| **Carb** | **-3.83** | **-7.87** | **-0.46** |
| Fat | -5.83 | -12.13 | 0.038 |
| **Carb*Fat** | **31.38** | **7.72** | **55.52** |
| LRT to Null Model | Deviance | df | p |
| Diet | 28.21 | 5.00 | <0.001 |
| Size of Junctional Zone | |  |  |
| Variable | estimate | 2.5% CI | 97.5% CI |
| **Protein** | **15.05** | **12.01** | **18.09** |
| **Carb** | **9.43** | **8.0** | **10.85** |
| **Fat** | **8.9** | **6.91** | **10.89** |
| LRT to Null Model | Deviance | df | p |
| Diet | **4592.50** | 3.00 | <0.001 |
| Size of Labyrinthine Zone |  |  |  |
| Variable | estimate | 2.5% CI | 97.5% CI |
| **Protein** | **16.37** | **11.48** | **21.27** |
| **Carb** | **23.73** | **21.44** | **26.03** |
| **Fat** | **20.37** | **17.17** | **23.57** |
| LRT to Null Model | Deviance | df | p |
| **Diet** | 18512 | **3.00** | **<0.001** |
| Placental Lactogen |  |  |  |
| Variable | estimate | 2.5% CI | 97.5% CI |
| Protein | 336.03 | -210.60 | 882.66 |
| Carb | -157.44 | -657.18 | 342.30 |
| Fat | -97.56 | -1011.70 | 816.58 |
| Carb*Fat | 3164.10 | -255.62 | 6583.82 |
| LRT to Null Model | Deviance | df | p |
| **Diet** | **5718584** | **4.00** | **<0.001** |

Table S1.2. The results of models on female physiology during pregnancy selected by AIC values as being the best fit for the data. Models are mixture models built in glmmTMB, and those tested included linear, quadratic and cubic relationships between diet components and interactions between diet components and female pregnancy status (virgin treatment or pregnancy treatment). Statistics reported are Coefficient estimates and 96% Confidence Intervals for each variable included in the best fitting mode and the deviance, esidual degrees of freedom and p value of Chisq Likelihood Ratio Test of the best model against null models for i) all diet components and ii) treatment. Models tested the effect of diet and pregnancy on: Glucose Tolerance (AUC from intravenous glucose tolerance test) , Insulin (ng/ml), Liver Weight (g), Weight at gestational day 17.5 (g), and the proportion of Beta cells in the pancreas.

| Glucose Tolerance (AUC) * |  |  |  |
| --- | --- | --- | --- |
| Control Females Model | estimate | 2.5% CI | 97.2% CI |
| **Carb** | **1011.49** | **907.73** | **1115.24** |
| **Protein** | **1153.3** | **981.84** | **1324.75** |
| **Fat** | **1034.71** | **906.85** | **1162.56** |
| Pregnant Females Model | estimate | 2.5% CI | 97.2% CI |
| **Carb** | **789.69** | **675.15** | **904.23** |
| **Protein** | **1602** | **1338.94** | **1866.38** |
| **Fat** | **1183.49** | **1019.4** | **134737** |
| LRT to Null Model | Deviance | df | p |
| **Treatment** | **469338** | **3** | **<0.001** |
| Insulin * |  |  |  |
| Control Females Model | estimate | 2.5% CI | 97.2% CI |
| Protein | 3.22 | -6.64 | 13.30 |
| Carb | -4.46 | -11.93 | 2.90 |
| **Fat** | **14.67** | **6.91** | **22.66** |
| Protein (quadratic) | -2.24 | -19.28 | 14.43 |
| Carb (quadratic) | 4.36 | -4.32 | 13.11 |
| **Fat (quadratic)** | **-17.10** | **-29.52** | **-5.21** |
| Pregnant Females Model | estimate | 2.5% CI | 97.2% CI |
| **Protein** | **-8.17** | **-13.93** | **-2.51** |
| Carb | 1.10 | -3.12 | 5.32 |
| **Fat** | **8.35** | **3.56** | **13.08** |
| **Protein (quadratic)** | **14.98** | **4.82** | **25.76** |
| Carb (quadratic) | 0.15 | -4.94 | 5.28 |
| **Fat (quadratic)** | **-7.92** | **-15.38** | **-0.37** |
| LRT to Null Model | Deviance | df | p |
| **Treatment** | **8.05** | **6** | **<0.001** |
| Liver Weight |  |  |  |
| Variable | estimate | 2.5% CI | 97.2% CI |
| Carbohydrate | -1.22 | -3.44 | 1.00 |
| Protein | -0.93 | -3.21 | 1.34 |
| Fat | -1.53 | -3.27 | 0.21 |
| Fat (cubic) | 0.14 | -3.44 | 3.71 |
| Virgin Treatment | 1.93 | -0.19 | 4.05 |
| Fat (cubic)*Protein | 2.54 | -11.40 | 16.49 |
| Fat (cubic)*Carbohydrate | 0.41 | -15.99 | 16.81 |
| **Fat (cubic)*Pregnancy Treatment** | **-8.32** | **-14.23** | **-2.41** |
| **Protein*Pregnancy Treatment** | **3.36** | **0.74** | **5.97** |
| **Carbohydrate*Pregnancy Treatment** | **2.78** | **0.36** | **5.20** |
| **Fat (cubic)*Protein*Pregnancy Treatment** | **32.67** | **9.30** | **56.05** |
| **Fat (cubic)*Carbohydrate*Pregnancy Treatment** | **36.49** | **8.60** | **64.38** |
| LRT to Null Model | Deviance | df | p |
| **Diet** | 0.83 | 10.00 | **<0.001** |
| **Pregnancy** | 10.47 | 6.00 | **<0.001** |
| Beta Cells Proportion |  |  |  |
| Variable | estimate | 2.5% CI | 97.2% CI |
| **Virgin Treatment** | **0.48** | **0.41** | **0.54** |
| **Pregnancy Treatment** | **0.67** | **0.59** | **0.76** |
| LRT to Null Model | Deviance | df | p |
| **Pregnancy** | **19.43** | **2** | **<0.001** |
| Weight |  |  |  |
| Variable | estimate | 2.5% CI | 97.2% CI |
| **Carbohydrate** | **36.89** | **14.94** | **58.85** |
| **Protein** | **49.53** | **32.63** | **66.43** |
| **Fat** | **38.08** | **16.17** | **59.98** |
| Protein (cubic) | 77.78 | -48.74 | 204.30 |
| Virgin Treatment | 18.83 | 17.42 | 34.80 |
| Protein (cubic)*Carb | -215.40 | -523.68 | 92.88 |
| Protein (cubic)*Fat | -241.35 | -586.76 | 104.06 |
| Protein (cubic)*Pregnancy | -61.24 | -276.03 | 153.55 |
| Carb*Pregnancy | -11.96 | -35.33 | 11.42 |
| Fat*Pregnancy | -11.17 | -34.66 | 12.33 |
| Protein (cubic)*Carb* Pregnancy | 96.09 | -452.93 | 645.11 |
| Protein (cubic)*Fat* Pregnancy | 8.18 | -560.19 | 576.55 |
| LRT to Null Model | Deviance | df | p |
| **Diet** | **51.71** | **10.00** | **<0.001** |
| **Pregnancy** | **3276.70** | **6.00** | **<0.001** |

* Model was rank deficient to the point of impeding interpretation, due to collinearity between fat and treatment, therefore two separate models were built to test the effect of diet in control animals and pregnant animals.

Table S1.3. The results of models of pup traits, selected by AIC values as being the best fit for the data. Models are mixture models guilt in glmmTMB, and those tested included linear, quadratic and cubic relationships between diet components and interactions between diet components. Models of pup growth and survival are repeated measures models and therefore include age/time as additional fixed effects and maternal ID as a random effect. Statistics reported are Coefficient estimates and 95% Confidence Intervals for each variable included in the best fitting mode and the deviance, residual degrees of freedom and p value of Chisq Likelihood Ratio Test of the best model against null models for the effect of diet. Models tested the effect of diet on: the total number, average weight and sex ratio of pups who survived to weaning (21 days of age), and the growth and survival of pups up to 21 days of age. Significant results are highlighted in bold.

| Number of Weaned Pups | | |  | |
| --- | --- | --- | --- | --- |
| Variable | estimate | 2.5% CI | | 97.5% CI |
| **Protein** | **7.30** | **4.85** | | **9.74** |
| **Carb** | **7.76** | **6.36** | | **9.15** |
| **Fat** | **5.35** | **3.51** | | **7.20** |
| LRT to Null Model | Deviance | df | | p |
| **Diet** | **3027.90** | **3.00** | | **<0.001** |
| Average Weight of Weaned Pups | | | |  |
| Variable | estimate | 2.5% CI | | 97.5% CI |
| **Protein** | **-21.04** | **-34.33** | | **-7.75** |
| Carb | -1.82 | -6.31 | | 2.68 |
| **Fat** | **-9.50** | **-18.43** | | **-0.58** |
| **Protein*Carb** | **72.58** | **32.08** | | **113.09** |
| **Protein*Fat** | **88.41** | **32.33** | | **144.49** |
| **Carb*Fat** | **48.46** | **14.00** | | **82.93** |
| Protein*Carb*Fat | -75.45 | -249.34 | | 98.44 |
| LRT to Null Model | Deviance | df | | p |
| **Diet** | **4449.20** | **7.00** | | **<0.001** |
| Sex Ratio of Weaned Pups | |  | |  |
| Variable | estimate | 2.5% CI | | 97.5% CI |
| **Protein** | **0.64** | **0.39** | | **0.89** |
| **Carb** | **0.50** | **0.36** | | **0.64** |
| **Fat** | **0.48** | **0.29** | | **0.67** |
| LRT to Null Model | Deviance | df | | p |
| **Diet** | **18.09** | **3.00** | | **<0.001** |
| Pup Growth |  |  | |  |
| Variable | estimate | 2.5% CI | | 97.5% CI |
| **Protein** | **1.74** | **0.95** | | **2.55** |
| **Carb** | **1.22** | **0.78** | | **1.66** |
| **Fat** | **0.91** | **0.35** | | **1.48** |
| **Age** | **1.77** | **1.88** | | **1.88** |
| LRT to Null Model | Deviance | df | | p |
| **Diet** | **545.49** | **4** | | **<0.001** |

Table S1.4. The results of models of the effect of lactation and diet on body composition immediately after the lactation period and 3.8 weeks following the cessation of lactation. The models presented were selected by AIC values as being the best fit for the data. Models are mixture models guilt in glm, and those tested included linear, quadratic and cubic relationships between diet components and interactions between diet components. Statistics reported are Coefficient estimates and 95% Confidence Intervals for each variable included in the best fitting mode and the deviance, residual degrees of freedom and p value of Chisq Likelihood Ratio Test of the best model against null models for the effect of diet. Models tested the effect of diet on: body fat mass and lean mass at day 22 post partum (1 day after weaning of pups), body fat mass and lean mass at day 49 post partum (1 month after pups were weaned and lactation ceased), . Significant results are highlighted in bold.

| Body Fat Immediately Following Lactation | | | |  | | |
| --- | --- | --- | --- | --- | --- | --- |
| **Control Females Model** | estimate | | 2.5% CI | | 97.5% CI | | |
| Protein | -4.12 | | -38.23 | | 29.99 | | |
| Carb | 3.69 | | -22.42 | | 29.81 | | |
| Fat | 9.89 | | -1.71 | | 21.49 | | |
| **Fat (cubic)** | **-19.67** | | **-38.97** | | **-0.37** | | |
| Protein (cubic) | 19.45 | | -54.08 | | 92.98 | | |
| Carb (cubic) | -2.40 | | -38.92 | | 34.13 | | |
| Fat (cubic)*Protein (cubic) | -330.51 | | -1331.15 | | 670.14 | | |
| Fat (cubic)*Carb (cubic) | -104.10 | | -1051.16 | | 842.96 | | |
| Lactated Females Model | estimate | | 2.5% CI | | 97.5% CI | | |
| **Protein** | **-60.68** | | **-91.80** | | **-29.55** | | |
| **Carb** | **53.35** | | **29.74** | | **76.96** | | |
| **Fat** | | **12.65** | **1.73** | | | **23.57** |
| Fat (cubic) | | -17.71 | -35.68 | | | 0.26 |
| **Protein (cubic)** | | **119.88** | **53.19** | | | **186.57** |
| **Carb (cubic)** | | **-72.67** | **-105.80** | | | **-39.54** |
| **Fat (cubic)*Protein (cubic)** | | **1628.22** | **738.30** | | | **2518.14** |
| **Fat (cubic)*Carb (cubic)** | | **-1650.09** | **-2538.90** | | | **-761.27** |
| LRT to Null Model | | Deviance | df | | | p |
| **Diet** | | **7.23** | **10** | | | **<0.001** |
| **Lactation** | | **7.30** | **7** | | | **<0.001** |

| Body Fat 1 month after Cessation of Lactation * | | |  | | |
| --- | --- | --- | --- | --- | --- |
| Control Females Model | estimate | 2.5% CI | | 97.5% CI | | |
| **Protein** | **25.26** | **-17.79** | | **68.31** | | |
| Carb | -19.43 | -52.10 | | 13.24 | | |
| **Fat** | **11.07** | **-3.66** | | **25.79** | | |
| Fat (cubic) | -22.95 | -46.82 | | 0.92 | | |
| **Protein (cubic)** | **-35.32** | **-128.21** | | **57.57** | | |
| **Carb (cubic)** | **31.75** | **-13.95** | | **77.45** | | |
| Fat (cubic)*Protein (cubic) | -1167.12 | -2389.28 | | 55.04 | | |
| **Fat (cubic)*Carb (cubic)** | **615.44** | **-613.46** | | **1844.34** | | |
| **Lactated Females Model** | estimate | 2.5% CI | | 97.5% CI | | |
| **Protein** | **-52.39** | **-80.70** | | **-24.08** | | |
| **Carb** | **43.46** | **21.98** | | **64.95** | | |
| **Fat** | **14.58** | **4.82** | | | **24.34** |
| Fat (cubic) | -14.88 | -31.06 | | | 1.29 |
| **Protein (cubic)** | **107.42** | **47.19** | | | **167.66** |
| **Carb (cubic)** | **-57.64** | **-87.74** | | | **-27.54** |
| **Fat (cubic)*Protein (cubic)** | **1052.50** | **234.01** | | | **1870.99** |
| Fat (cubic)*Carb (cubic) | -1523.52 | -2316.51 | | | -730.53 |
| LRT to Null Model | Deviance | df | | | p |
| Diet | 4.96 | 14 | | | <0.001 |
| Lactation | 4.03 | 11 | | | <0.001 |
| Lean Mass Immediately Following Lactation * | | |  | | |
| Control Females Model | estimate | 2.5% CI | | 97.5% CI | | |
| Protein | 12.14 | -9.52 | | 33.81 | | |
| **Carb** | **17.90** | **1.31** | | **34.48** | | |
| **Fat** | **15.32** | **7.96** | | **22.69** | | |
| Fat (cubic) | -1.82 | -14.07 | | 10.44 | | |
| Protein (cubic) | -2.18 | -48.87 | | 44.52 | | |
| Carb (cubic) | -3.07 | -26.27 | | 20.13 | | |
| Fat (cubic)*Protein (cubic) | 574.20 | -61.29 | | 1209.69 | | |
| Fat (cubic)*Carb (cubic) | 100.22 | -501.24 | | 701.68 | | |
| Lactated Females Model | estimate | 2.5% CI | | 97.5% CI | | |
| Protein | -27.16 | -59.23 | | 4.89 | | |
| **Carb** | **53.78** | **29.37** | | **78.29** | | |
| **Fat** | **35.76** | **24.67** | | | **46.84** |
| **Fat (cubic)** | **-29.7** | **-48.02** | | | **-11.38** |
| **Protein (cubic)** | **78.58** | **9.81** | | | **147.35** |
| **Carb (cubic)** | **-57.11** | **-91.35** | | | **-22.87** |
| Fat (cubic)*Protein (cubic) | 893.25 | -33.48 | | | 1819.97 |
| **Fat (cubic)*Carb (cubic)** | **-1537.26** | **-2440.82** | | | **-633.7** |
| LRT to Null Model | Deviance | df | | | p |
| Diet | 132.55 | 14 | | | <0.001 |
| Lactation | 975.03 | 11 | | | <0.001 |
| Lean Mass 1 month after Cessation of Lactation | | |  | | |
| Variable | estimate | 2.5% CI | | 97.5% CI | | |
| **Protein** | **24.73** | **18.04** | | **31.41** | | |
| **Carb** | **13.01** | **8.15** | | **17.87** | | |
| **Fat** | **25.63** | **19.87** | | **31.38** | | |
| Protein (quadratic) | -11.69 | -23.46 | | 0.07 | | |
| **Carb (quadratic)** | **6.76** | **0.55** | | **12.97** | | |
| Fat (quadratic) | -4.99 | -14.23 | | 4.25 | | |
| **Control Treatment** | **-3.74** | **-6.34** | | **-1.15** | | |
| **Protein (quadratic)*Lactation** | **-9.62** | **-18.86** | | **-0.39** | | |
| **Carb (quadratic)*Lactation** | **-5.97** | **-10.85** | | **-1.09** | | |
| **Fat (quadratic)*Lactation** | **-8.64** | **-15.29** | | **-1.99** | | |
| LRT to Null Model | Deviance | df | | | p |
| **Diet** | 47.61 | 6 | | | <0.001 |
| **Lactation** | 506.39 | 5 | | | <0.001 |

* Model was rank deficient to the point of impeding interpretation, due to collinearity between fat and treatment, therefore two separate models were built to test the effect of diet in control animals and pregnant animals.

Table S1.5. The results of models on female physiology during lactation selected by AIC values as being the best fit for the data. Models are mixture models guilt in glmmTMB, and those tested included linear, quadratic and cubic relationships between diet components and interactions between diet components and female pregnancy status (virgin treatment or pregnancy treatment). Statistics reported are: Coefficient estimates and 95% Confidence Intervals for each variable included in the best fitting model and, the deviance, residual degrees of freedom and p value of Chisq Likelihood Ratio Test of the best model against null models for i) all diet components and ii) treatment. Models tested the effect of diet and pregnancy on: Glucose Tolerance (Area Under the Curve calculated from blood sugar levels following an intravenous glucose tolerance test), Insulin (mg/ml), Liver Weight (g), repeated measures of weight (g) starting at 5 days after birth (4.4 weeks consuming diet) to 4 weeks after weaning (11 weeks consuming diet), and finally, the proportion of Beta cells in the pancreas.

| Glucose Tolerance (AUC) † |  |  |  |
| --- | --- | --- | --- |
| Variable | estimate | 2.5% CI | 97.5% CI |
| **log(Protein)*log(Fat)** | **47.16** | **11.90** | **82.42** |
| log(Carb)*log(Fat) | 4.06 | -32.32 | 40.43 |
| **Virgin Treatment** | **1158.31** | **1123.17** | **1193.44** |
| **Lactation Treatment** | **1069.66** | **1033.34** | **1105.99** |
| log(Protein)* log(Fat)*Lactation Treatment | -38.14 | -91.08 | 14.81 |
| log(Carb)* log(Fat)*Lactation Treatment | -20.04 | -71.94 | 31.86 |
| LRT to Null Model | Deviance | df | p |
| **Diet** | 14.43 | 6 | <0.001 |
| **Lactation** | 155.32 | 6 | 0.03 |
| Insulin |  |  |  |
| Variable | estimate | 2.5% CI | 97.5% CI |
| Protein | -5.75 | -26.18 | 14.67 |
| Carb | 12.90 | -2.25 | 28.05 |
| Fat | -1.07 | -19.06 | 16.92 |
| Carb (quadratic) | -12.91 | -29.58 | 3.77 |
| Fat (quadratic) | 2.47 | -17.81 | 22.74 |
| Protein (quadratic) | 9.72 | -13.35 | 32.78 |
| **Control Treatment** | **-1.66** | **-3.17** | **-0.14** |
| Carb (quadratic)*Fat (quadratic) | -30.75 | -129.50 | 68.00 |
| Carb (quadratic)*Protein (quadratic) | -38.22 | -116.44 | 40.00 |
| Carb (quadratic)*Lactation | -1.98 | -4.29 | 0.33 |
| Fat (quadratic)*Lactation | -0.94 | -4.22 | 2.34 |
| **Protein (quadratic)*Lactation** | **-5.83** | **-10.84** | **-0.82** |
| **Carb (quadratic)*Fat (quadratic)*Lactation** | **-40.59** | **-65.95** | **-15.24** |
| Carb (quadratic)*Protein (quadratic)*Lactation | 1.69 | -21.47 | 24.84 |
| LRT to Null Model | Deviance | df | p |
| **Diet** | **1.98** | **6** | <0.05 |
| **Treatment** | **4.27** | **7** | <0.01 |
| Liver Weight |  |  |  |
| Variable | estimate | 2.5% CI | 97.2% CI |
| **Virgin Treatment** | **1.06** | **1.02** | **1.11** |
| **Lactation Treatment** | **0.92** | **0.88** | **0.96** |
| LRT to Null Model | Deviance | df | p |
| **Lactation** | **0.69** | **1** | **<0.001** |
| Beta Cells Proportion |  |  |  |
| Variable | estimate | 2.5% CI | 97.2% CI |
| **Virgin Treatment** | **1.54** | **1.23** | **1.85** |
| **Lactation Treatment** | **1.54** | **1.27** | **1.81** |
| LRT to Null Model | Deviance | df | p |
| **Lactation** | **92.60** | **2** | **<0.001** |
| Weight * |  |  |  |
| Control Females Model | estimate | 2.5% CI | 97.2% CI |
| **Protein** | **0.99** | **0.26** | **1.72** |
| **Carb** | **1.20** | **0.64** | **1.76** |
| **Fat** | **1.22** | **0.96** | **1.48** |
| Fat (cubic) | -0.26 | -0.69 | 0.17 |
| Protein (cubic) | 0.30 | -1.27 | 1.87 |
| Carb (cubic) | -0.10 | -0.88 | 0.68 |
| Fat (cubic) * Protein (cubic) | 3.17 | -18.25 | 24.59 |
| Fat (cubic) * Carb (cubic) | -0.31 | -20.53 | 19.91 |
| Lactated Females Model | estimate | 2.5% CI | 97.2% CI |
| Protein | 0.03 | -0.42 | 0.49 |
| **Carb** | **2.13** | **1.78** | **2.48** |
| **Fat** | **1.52** | **1.36** | **1.67** |
| **Fat (cubic)** | **-0.59** | **-0.85** | **-0.33** |
| **Protein (cubic)** | **2.08** | **1.11** | **3.05** |
| **Carb (cubic)** | **-1.47** | **-1.96** | **-0.98** |
| **Fat (cubic) * Protein (cubic)** | **23.91** | **10.73** | **37.10** |
| **Fat (cubic) * Carb (cubic)** | **-37.50** | **-50.26** | **-24.74** |
| LRT to Null Model | Deviance | df | p |
| **Diet** | **56.7** | **14** | **<0.001** |
| **Pregnancy** | **79.2** | **8** | **<0.001** |
|  |  |  |  |

* Model was rank deficient to the point of impeding interpretation, due to collinearity between diet fat content and treatment, therefore two separate models were built to test the effect of diet in control animals and pregnant animals.

*† Uneven distribution of diets in lactated group led to to poor model fit, therefore opted for log ratio transformation of diet components.*

Table S1.6. The results of models on female food intake selected by AIC values as being the best fit for the data. Models are mixture models guilt in glm, and those tested included linear, quadratic and cubic relationships between diet components and interactions between diet components and female pregnancy status (virgin treatment or pregnancy treatment). Statistics reported are: Coefficient estimates and 95% Confidence Intervals for each variable included in the best fitting model, the deviance, residual degrees of freedom and p value of Chisq Likelihood Ratio Test of the best model against null models for all diet components and variance and standard error of random effects when appropriate.

| Food Intake after 3.5 weeks Consuming Diet (Control Group) | | | | |  | |
| --- | --- | --- | --- | --- | --- | --- |
| Variable | estimate | | 2.5% CI | | 97.5% CI | |
| **Protein** | **0.26** | | **0.12** | | **0.42** | |
| **Fat** | **0.20** | | **0.13** | | **0.28** | |
| **Carb** | **0.40** | | **0.36** | | **0.45** | |
| **Protein*Fat** | **0.58** | | **0.026** | | **1.14** | |
| LRT to Null Model | Deviance | | df | | p | |
| **Diet** | **74.28** | | **3** | | **<0.001** | |
| Food Intake During Pregnancy (Gest. Day 13-15) |  | |  | |  | |
| Variable | estimate | | 2.5% CI | | 97.5% CI | |
| **Protein** | **0.32** | | **0.25** | | **0.34** | |
| **Carb** | **0.26** | | **0.22** | | **0.29** | |
| **Fat** | **0.23** | | **0.19** | | **0.27** | |
| LRT to Null Model | Deviance | | df | | p | |
| Diet | 56.31 | | **2** | | 0.19 | |
| Food Intake after 6 weels Consuming Diet (Control Group) | | | | | | |
| Variable | estimate | | 2.5% CI | | 97.2% CI | |
| Protein | -1.22 | | -7.43 | | 5.00 | |
| **Carb** | **2.58** | | **1.73** | | **3.42** | |
| **Fat** | **5.40** | | **4.28** | | **6.52** | |
| Protein (cubic) | 18.75 | | -44.68 | | 82.18 | |
| Protein (cubic) * Carb | 7.64 | | -144.72 | | 159.99 | |
| Protein (cubic) * Fat | -19.86 | | -193.26 | | 153.55 | |
| LRT to Null Model | Deviance | | df | | p | |
| **Diet** | **120.42** | | **6** | | **<0.001** | |
| Food Intake during Peak Lactation (Pups 10 – 15 days old) |  | |  | |  | |
| Variable | estimate | | 2.5% CI | | 97.2% CI | |
| **Protein** | **-581.11** | | **-1102.29** | | **-59.94** | |
| **Carb** | **597.75** | | **96.58** | | **1098.91** | |
| Fat | 58.60 | | -33.60 | | 150.80 | |
| Protein (cubic) | 637.17 | | 65.96 | | 1208.37 | |
| **Carb (cubic)** | **-71.38** | | **-178.30** | | **35.54** | |
| **Fat (cubic)** | **-652.67** | | **-1204.11** | | **-101.24** | |
| **Fat (cubic) * Protein (cubic)** | **1947.45** | | **276.34** | | **3618.56** | |
| **Fat (cubic * Carb (cubic)** | **-2327.84** | | **-4447.93** | | **-207.75** | |
| LRT to Null Model | Deviance | | df | | p | |
| **Diet** | **309.24** | | **8** | | **<0.001** | |
| Food Intake during Peak Lactation (Pups 10 – 15 days old), controlling for Litter Weight | | | | | | | |
| Variable | | estimate | | 2.5% CI | | 97.2% CI | |
| **Protein** | | | **-536.57** | | **-1060.85** | | **-12.29** | |
| **Carb** | | | **562.22** | | **56.88** | | **1067.56** | |
| Fat | | | 36.27 | | -58.83 | | 131.27 | |
| **Protein (quadratic)** | | | **588.71** | | **14.59** | | **1162.83** | |
| **Carb (quadratic)** | | | **-612.66** | | **1168.47** | | **-56.85** | |
| Fat (quadratic) | | | -45.52 | | -58.83 | | 131.37 | |
| **Fat (quadratic) * Protein (quadratic)** | | | **1909.47** | | **219.49** | | **3599.45** | |
| Fat (quadratic) * Carb (quadratic) | | | -2097.87 | | -4242.65 | | 46.91 | |
|  | | |  | | Variance | | Std. Dev. | |
| Litter Size (day 10 of lactation) | | |  | | 2.82 | | 1.68 | |
| LRT to Null Model | | | Deviance | | df | | p | |
| **Diet** | | | **288.99** | | **6** | | **<0.001** | |
| Food Intake 4 weeks Post Lactation / after 13 weeks Consuming Diet (no effect of treatment) | | | | | | | |
| Variable | | estimate | | 2.5% CI | | 97.2% CI | |
| **Protein** | | **2.54** | | **2.11** | | **2.99** | |
| **Carb** | | **2.64** | | **2.38** | | **2.9** | |
| **Fat** | | **3.29** | | **2.89** | | **3.69** | |
| LRT to Null Model | | Deviance | | df | | p | |
| **Diet** | | **108.08** | | **3** | | **<0.001** | |
|  |  | |  | |  | |
